# Supplementary material for: A study of the interaction between TMAO and urea in water using NMR spectroscopy
Source: Royal Society of Chemistry journal article supplement (doi:10.1039/d2cp02475f), 2022-01-01
Supplement: d2cp02475f1.pdf [file d2cp02475f1.pdf]

## A study of the interaction between TMAO and urea in water using NMR spectroscopy.

Mazin Nasralla<sup>a</sup>, Harrison Laurent<sup>a</sup>, Daniel Baker<sup>a</sup>, Michael. E. Ries<sup>a</sup>, Lorna Dougan<sup>\*a</sup>

<sup>a</sup>School of Physics and Astronomy, University of Leeds, Leeds, LS2 9JT, England.

E-mail: l.dougan@leeds.ac.uk

May 27, 2022

### Supplementary Information

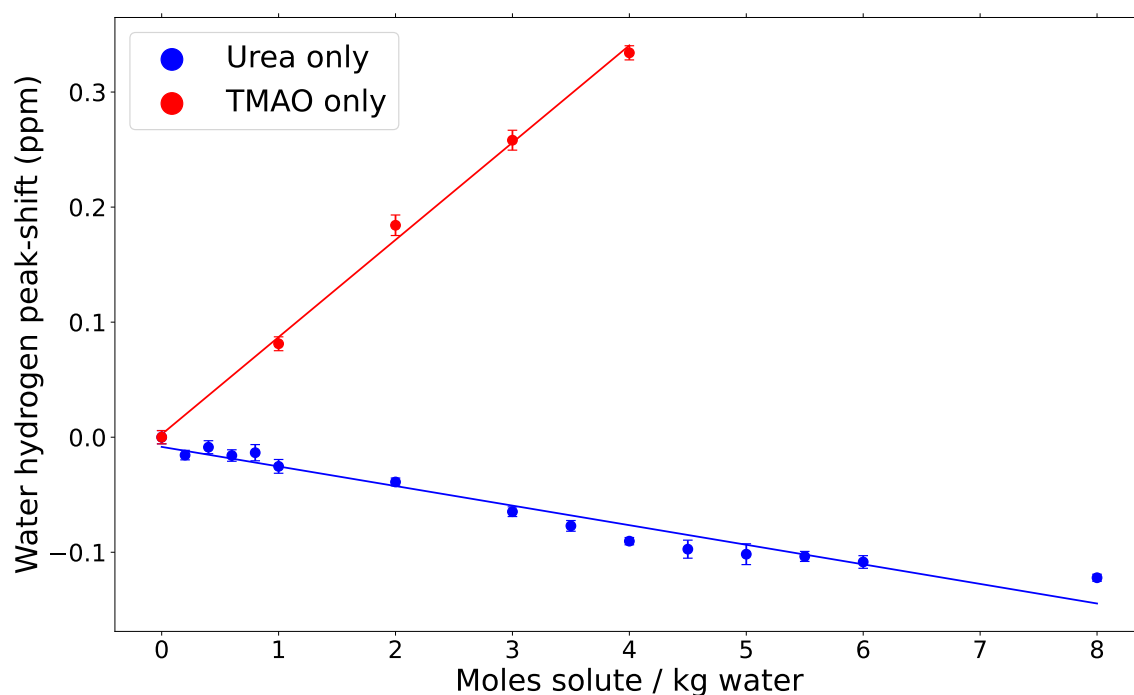

Figure S1: The NMR spectral peaks of hydrogen atoms in binary solutions of aqueous urea and TMAO reveal opposing effects. TMAO generates a strong blue shift in the spectral peak of hydrogen atoms in water indicative of strong hydrogen bonding, whilst urea generates a relatively minor effect. The lines are linear fits to the data points.

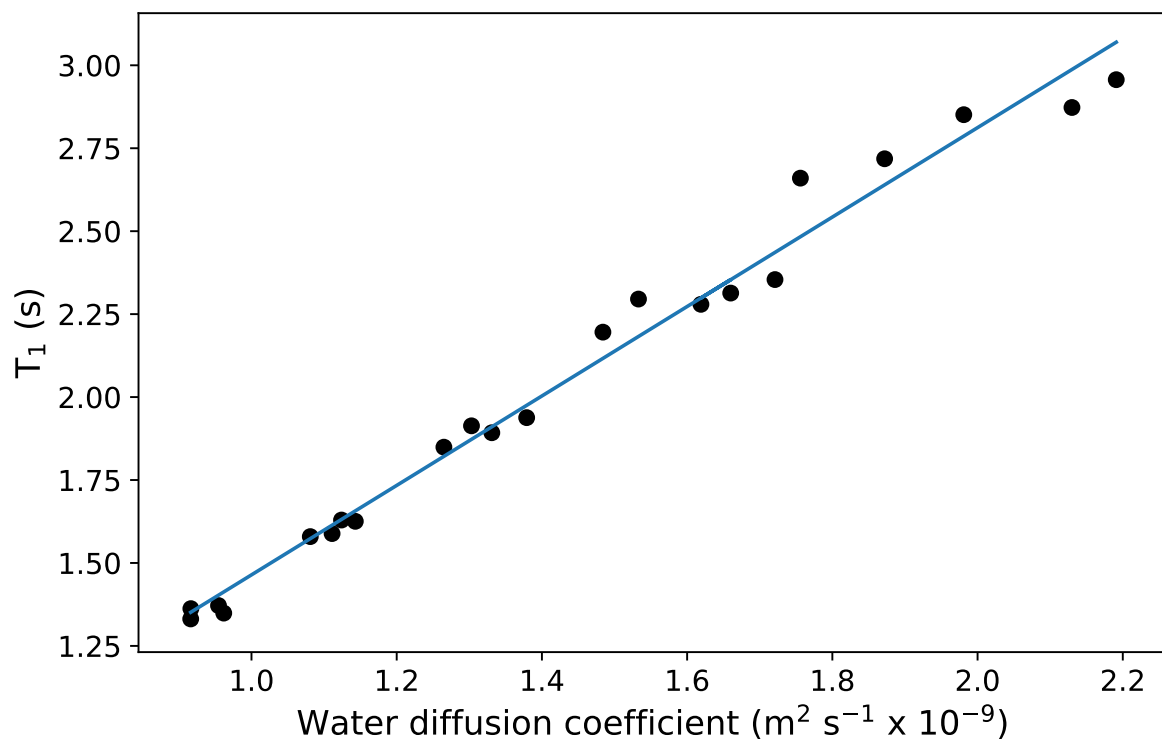

Figure S2: A comparison of the diffusion coefficient and  $T_1$  for water in TMAO-urea-water mixtures. The correlation implies that the data is self-consistent and that the translational and rotational dynamics are driven by the same micro-viscosity.

Table 1: The  $H^1$  peak-shifts in TMAO and urea were measured in 16 mixed TMAO-urea-water solutions at 300 K. The experiment was repeated three times and the values recorded below are the mean measurements. The peak-shift in TMAO was benchmarked to 1 molal TMAO in pure water, whilst the peak-shift in Urea was bench-marked to an 8 molal urea solution.

| TMAO (Molal) | Urea (Molal) | $H^1$ TMAO peak-shift (ppm) | $H^1$ urea peak-shift (ppm) |
|--------------|--------------|-----------------------------|-----------------------------|
| 1.0          | 1.9          | -0.011                      | 0.053                       |
| 1.0          | 3.9          | -0.021                      | 0.052                       |
| 1.0          | 5.8          | -0.026                      | 0.047                       |
| 1.0          | 7.7          | -0.037                      | 0.039                       |
| 1.9          | 1.9          | 0.005                       | 0.095                       |
| 1.9          | 3.9          | -0.004                      | 0.09                        |
| 1.9          | 5.8          | -0.016                      | 0.081                       |
| 1.9          | 7.7          | -0.027                      | 0.078                       |
| 2.7          | 1.9          | 0.015                       | 0.131                       |
| 2.7          | 3.9          | 0.004                       | 0.12                        |
| 2.7          | 5.8          | -0.011                      | 0.112                       |
| 2.7          | 7.7          | -0.008                      | 0.119                       |
| 3.5          | 1.9          | 0.014                       | 0.155                       |
| 3.5          | 3.9          | 0.006                       | 0.149                       |
| 3.5          | 5.8          | -0.004                      | 0.143                       |
| 3.5          | 7.7          | 0.000                       | 0.148                       |
